# Supplementary material for: Core-crosslinked amphiphilic biodegradable copolymer based on the complementary multiple hydrogen bonds of nucleobases: synthesis, self-assembly and in vitro drug delivery
Source: Royal Society of Chemistry journal article supplement (doi:10.1039/c2jm34852g), 2012-01-01
Supplement: c2jm34852g.pdf [file c2jm34852g.pdf]

# Core-crosslinked Amphiphilic Biodegradable Copolymer based on the Complementary Multiple Hydrogen Bonds of Nucleobases: Synthesis, Self-assembly and *in vitro* Drug Delivery

Huihui Kuang,<sup>a,b</sup> Suhong Wu,<sup>a,b</sup> Fanbo Meng,<sup>\*\*c</sup> Zhigang Xie,<sup>a</sup> Xiabin Jing,<sup>a</sup> Yubin Huang<sup>\*a</sup>

<sup>a</sup> State Key Laboratory of Polymer Physics and Chemistry, Changchun Institute of Applied Chemistry, Chinese Academy of Sciences, Changchun 130022, P. R. China

<sup>b</sup> Graduate School of Chinese Academy of Sciences, Beijing 100039, P. R. China

<sup>c</sup> The Cardiology Department of China-Japan Union Hospital of Jilin University, No. 126 Xiantai Str., Changchun 130033, P. R. China

\* Correspondence to: Yubin Huang, State Key Laboratory of Polymer Physics and Chemistry, Changchun Institute of Applied Chemistry, Chinese Academy of Sciences, Changchun 130022, People's Republic of China. Tel & Fax: +86-431-85262769; E-mail: [ybhuang@ciac.jl.cn](mailto:ybhuang@ciac.jl.cn)

\*\* Co-correspondence to: Fanbo Meng, The Cardiology Department of China-Japan Union Hospital of Jilin University, No. 126 Xiantai Str., Changchun 130033, P. R. China. Tel & Fax: +86-13159757035; E-mail: [mengfb@jlu.edu.cn](mailto:mengfb@jlu.edu.cn)

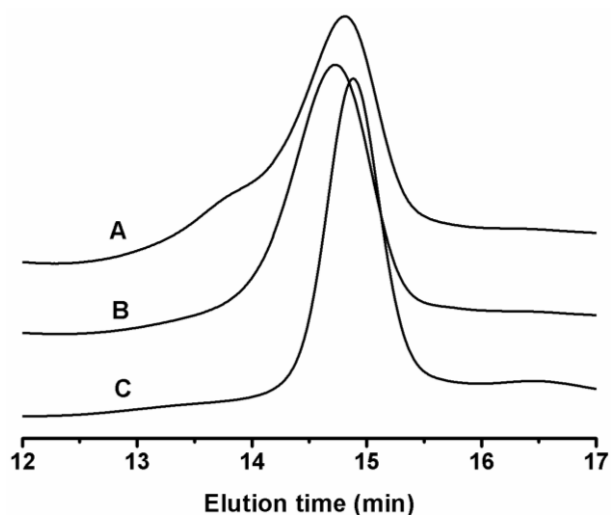

**Figure S1.** GPC spectra of mPEG-*b*-P(LA<sub>3</sub>-*co*-MAC<sub>11</sub>)(A), mPEG-*b*-P(LA<sub>8</sub>-*co*-MAC<sub>6</sub>) (B) and mPEG-*b*-P(LA<sub>13</sub>-*co*-MAC<sub>2</sub>) (C).

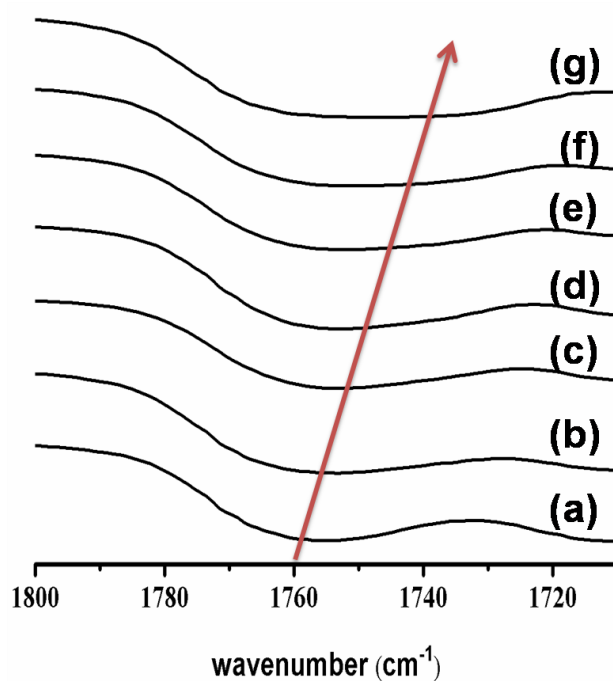

**Figure S2.** FT-IR spectra recorded at room temperature in the range of 1800–1710 cm<sup>-1</sup> for mPEG-*b*-P(LA<sub>3</sub>-*co*-MPT<sub>22</sub>) in the bulk state in the presence of different content of mPEG-*b*-P(LA<sub>3</sub>-*co*-MPA<sub>22</sub>) (n(A)/n(T), mol/mol): (a) 0/10, (b) 3/7, (c) 4/6, (d) 5/5, (e) 6/4, (f) 7/3 and (g) 5/1) .

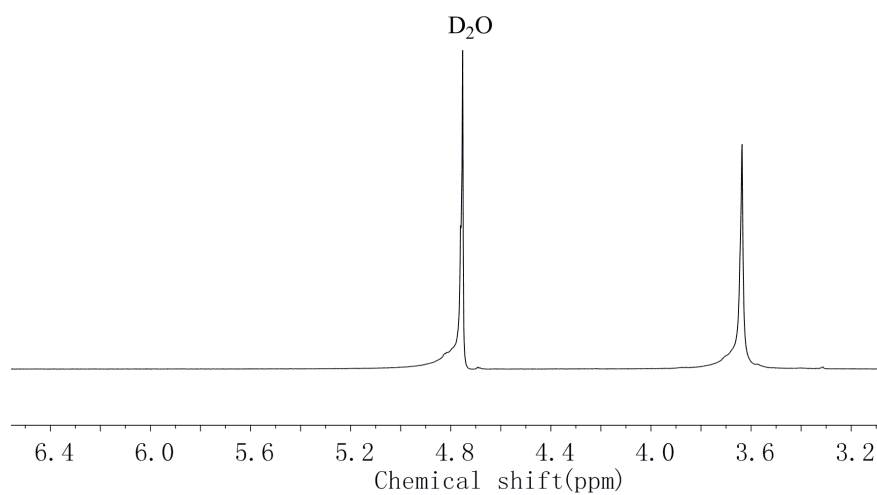

**Figure S3.** <sup>1</sup>H NMR of mPEG-*b*-P(LA<sub>3</sub>-*co*-MPA<sub>22</sub>)/mPEG-*b*-P(LA<sub>3</sub>-*co*-MPT<sub>22</sub>) micelle in D<sub>2</sub>O.
